# Supplementary material for: Pre-crosslinking enables a promising cyclodextrin-derived carbon anode with large plateau capacity for sodium ion batteries
Source: Royal Society of Chemistry journal article supplement (doi:10.1039/d3nj04843h), 2023-12-09
Supplement: d3nj04843h1.pdf [file d3nj04843h1.pdf]

## Electronic Supporting Information

### Pre-crosslinking enables a promising cyclodextrin-derived carbon anode with large plateau capacity for sodium ion batteries

Haifeng Ding<sup>a,b</sup>, Liang Yue<sup>a,b</sup>, Yonghang Liu<sup>a,b</sup>, Yi Zhang<sup>a,b</sup>, Qing Zhao<sup>a,b</sup>, Peipei Zhi<sup>a,b</sup>, Yuruo Qi<sup>a,b,\*</sup>, Maowen Xu<sup>a,b,\*\*</sup>

H. F. Ding, L. Yue, Y. H. Liu, Y. Zhang, Q. Zhao, P. P. Zhi, Prof. Y. R. Qi, Prof. M. W. Xu

a School of Materials and Energy, Southwest University, Chongqing, 400715, PR China

b Chongqing Key Lab for Advanced Materials and Clean Energies of Technologies, Southwest University, Chongqing, 400715, PR China

\*Corresponding author.

E-mail: [xumaowen@swu.edu.cn](mailto:xumaowen@swu.edu.cn) (Prof. M.W. Xu); [qiyuruo@swu.edu.cn](mailto:qiyuruo@swu.edu.cn) (Prof. Y. R. Qi)

Address: Southwest University, No. 2, Tiansheng Road, Beibei District of Chongqing, China

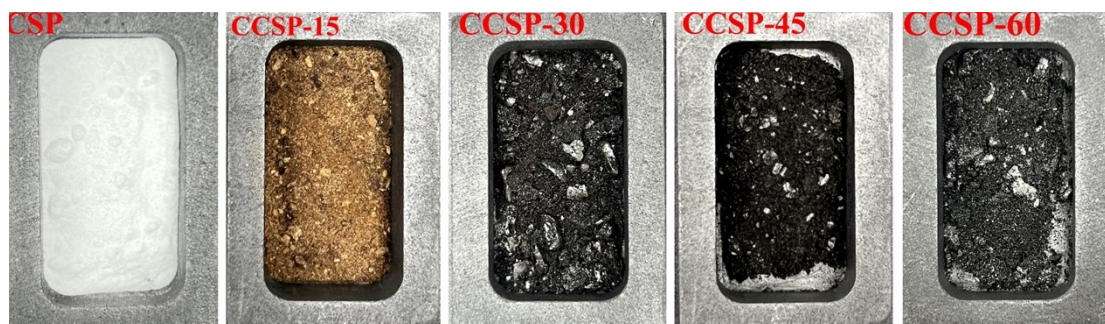

Fig. S1. Optical imaging of these precursors.

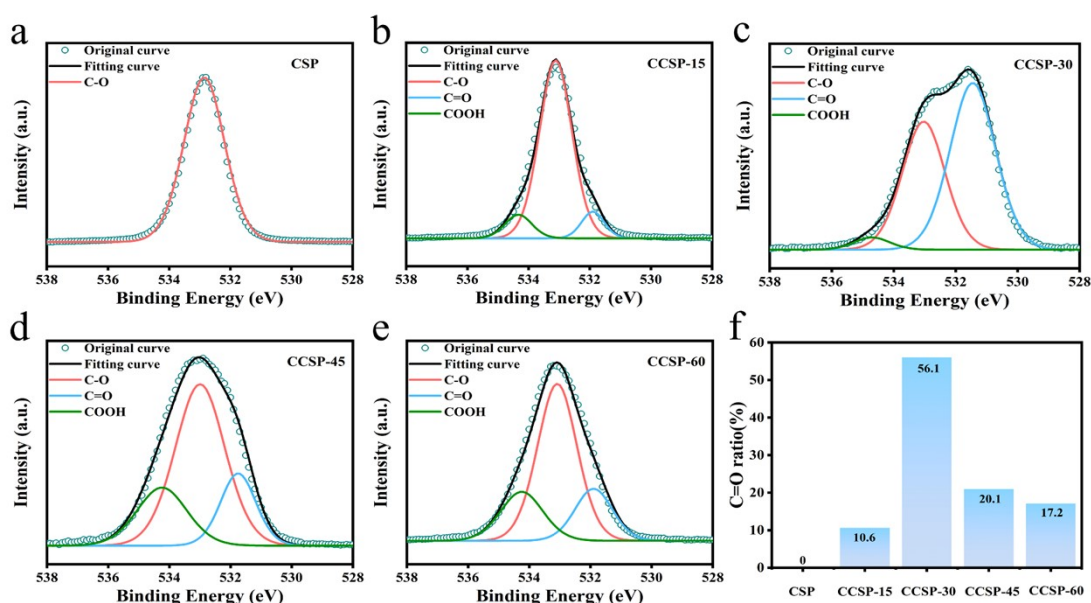

Fig. S2. High-resolution O 1s XPS spectra of these precursors. (a) CSP, (b) CCSP-15, (c)

CCSP-30, (d) CCSP-45 and (e) CCSP-60, respectively; (f) Variation of C=O contents in these precursors.

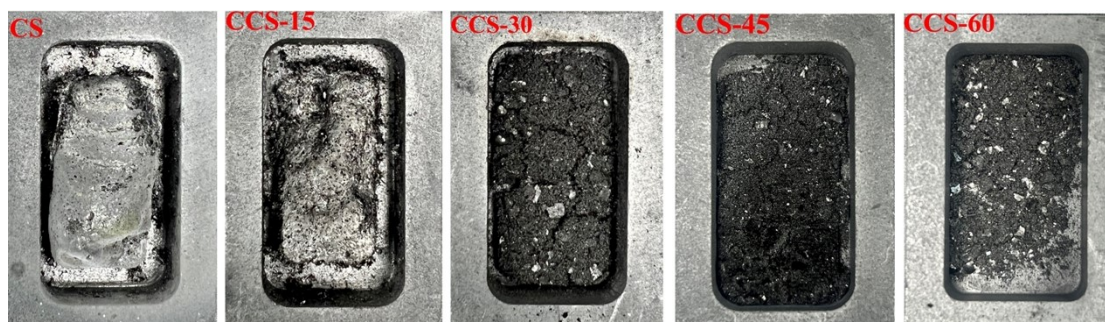

Fig. S3. Optical imaging of these as-obtained hard carbon samples.

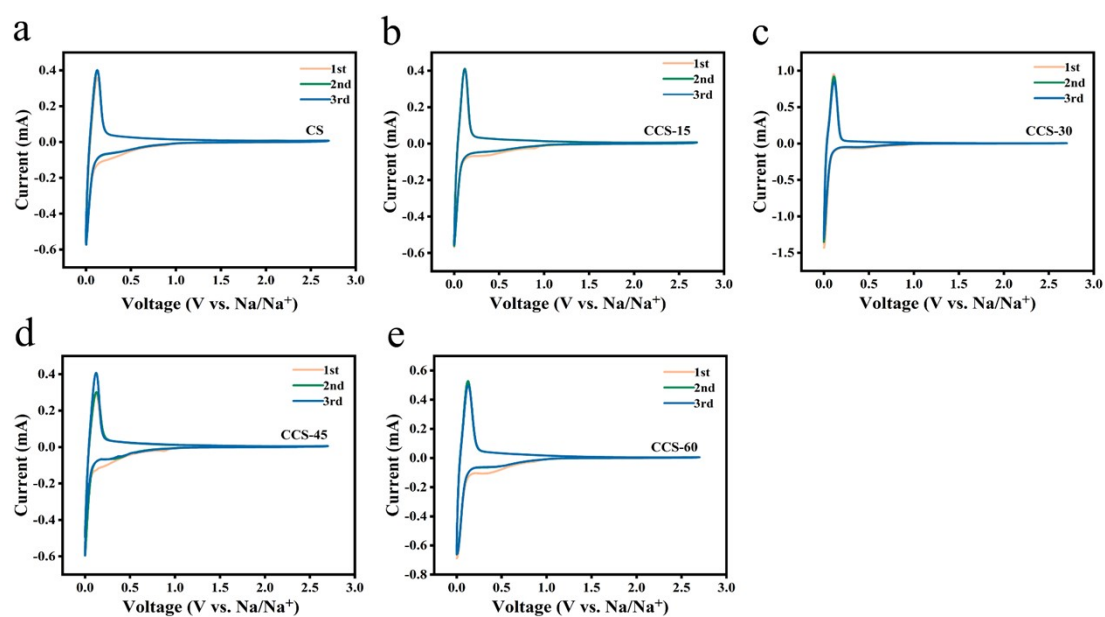

Fig. S4. CV curves of these samples at  $0.1 \text{ mV s}^{-1}$

**Table 1 Structural parameters calculated** from XRD, Raman, Nitrogen adsorption-desorption and SAXS results.

| Sample | XRD              | Raman         |           | Nitrogen adsorption |                                                | SAXS                                             | Percentage of closed pores |                                  |
|--------|------------------|---------------|-----------|---------------------|------------------------------------------------|--------------------------------------------------|----------------------------|----------------------------------|
|        | $d_{002}$<br>(Å) | $L_c$<br>(nm) | $I_D/I_G$ | $L_a$<br>(nm)       | $S_{BET}$<br>(m <sup>2</sup> g <sup>-1</sup> ) | $V_{pore}$<br>(cm <sup>3</sup> g <sup>-1</sup> ) | Intensity                  | $P(c) = 1 - \frac{V(op)}{I(wp)}$ |
| CS     | 4.12             | 3.05          | 1.53      | 12.56               | 518.02                                         | 0.3316                                           | 0.6122                     | 45.84%                           |
| CCS-15 | 4.18             | 3.20          | 1.48      | 12.98               | 3.63                                           | 0.0063                                           | 0.5030                     | 98.75%                           |
| CCS-30 | 4.20             | 2.98          | 1.74      | 11.04               | 1.47                                           | 0.0051                                           | 0.4663                     | 98.91%                           |
| CCS-45 | 4.19             | 3.12          | 1.43      | 13.44               | 2.93                                           | 0.0055                                           | 0.4310                     | 98.73%                           |
| CCS-60 | 4.17             | 3.17          | 1.40      | 13.73               | 4.34                                           | 0.0078                                           | 0.3780                     | 97.92%                           |
